# Supplementary material for: Bioprospection and secondary metabolites profiling of marine Streptomyces levis strain KS46
Source: PubMed Central journal article supplement — Saudi J Biol Sci. 2021 Dec 1;29(2):667–79. doi: 10.1016/j.sjbs.2021.11.055 (PMC8847965; doi:10.1016/j.sjbs.2021.11.055), 2021-12-01
Supplement: mmc1.pdf [file mmc1.pdf]

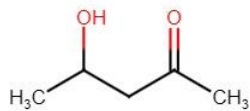

2-Pentanone, 4-hydroxy

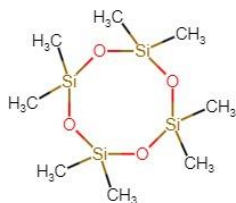

Cyclotetrasiloxane, octamethyl-

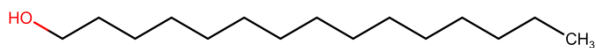

n-Pentadecanol

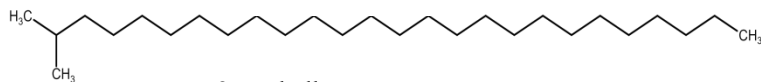

2-methylhexacosane

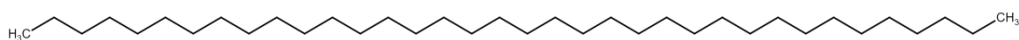

Hexatriacontane

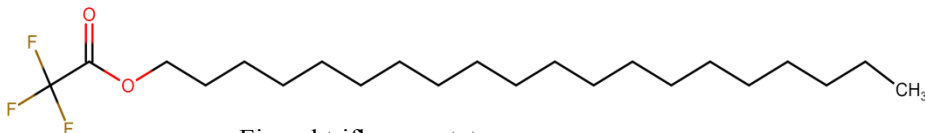

Eicosyl trifluoroacetate

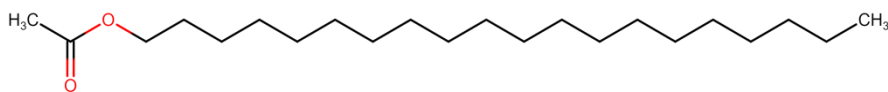

Eicosyl acetate

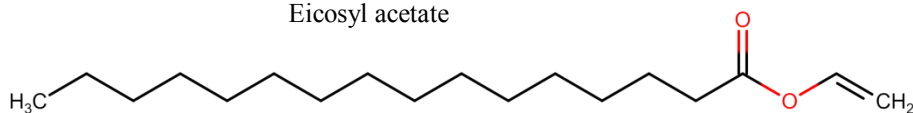

Palmitic acid vinyl ester

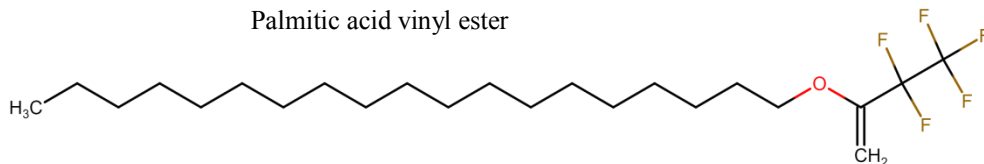

Nonadecyl pentafluoropropionate

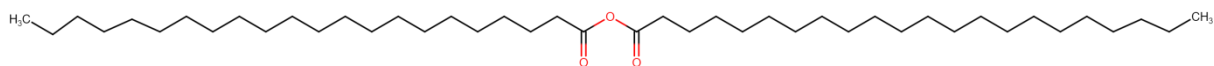

Docosanoic anhydride

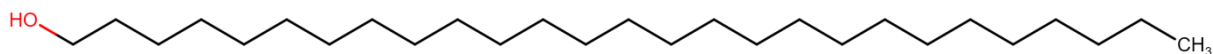

1-Heptacosanol

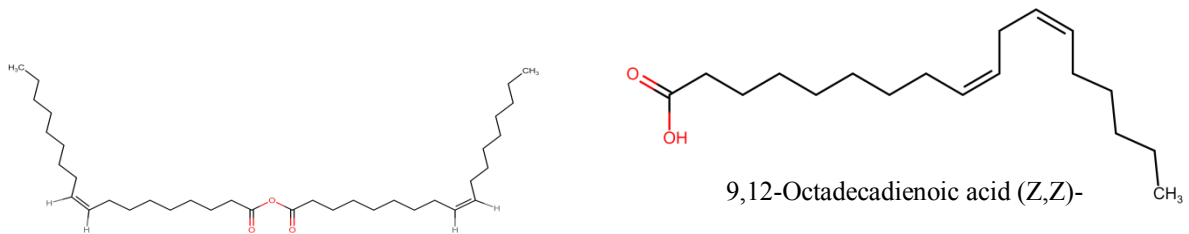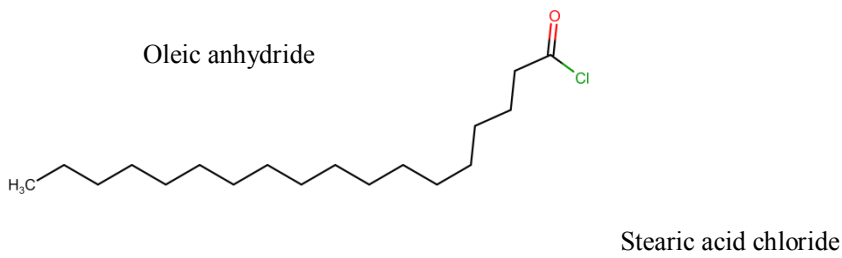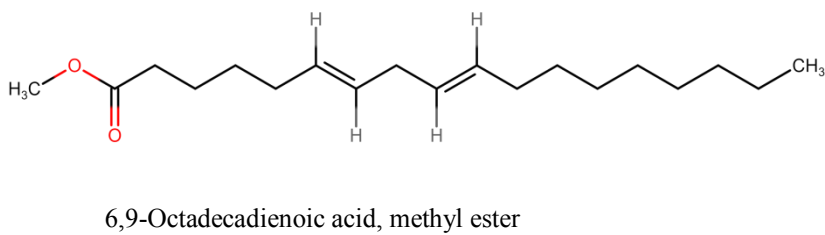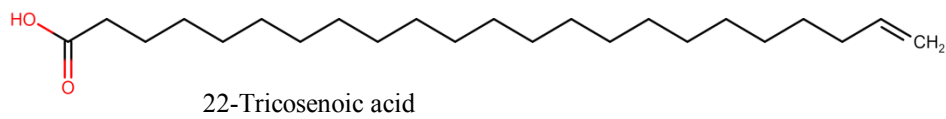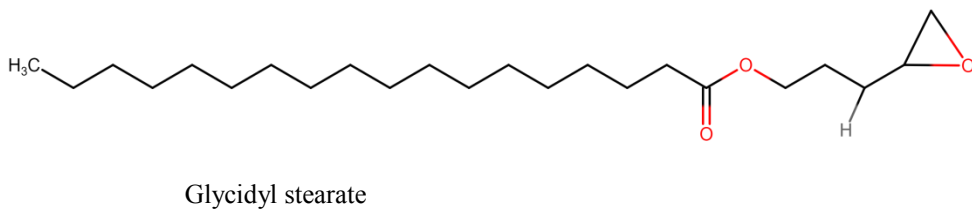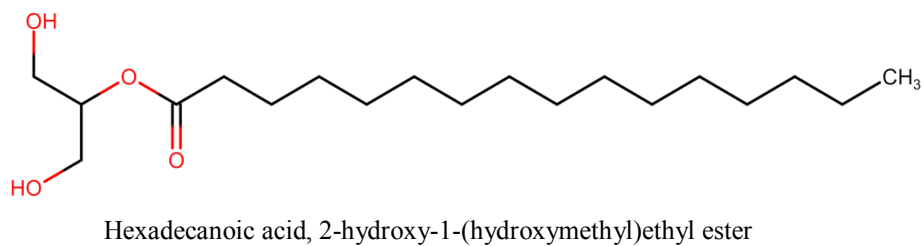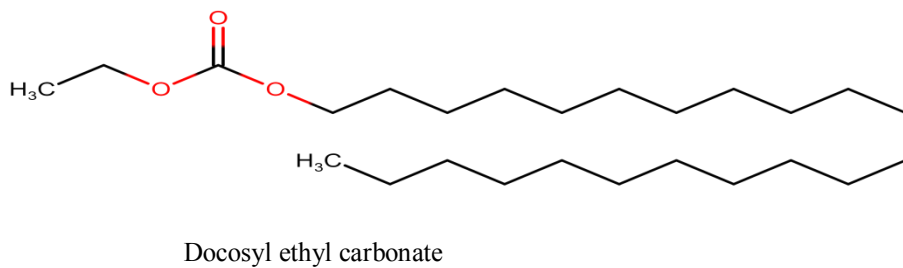

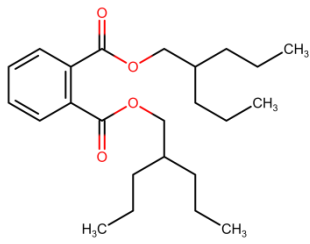

Phthalic acid, di(2-propylpentyl) ester

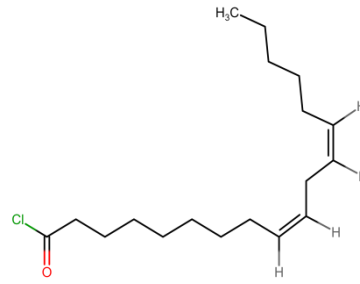

9,12-Octadecadienoyl chloride, (9Z,12Z)-

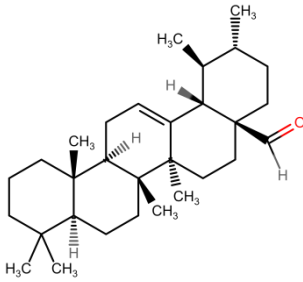

Urs-12-en-28-al

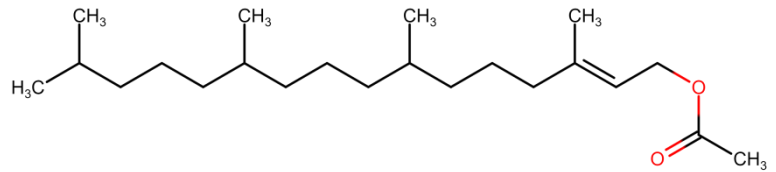

Phytol, acetate

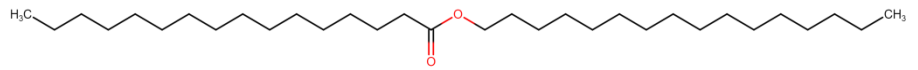

Hexadecanoic acid, hexadecyl ester

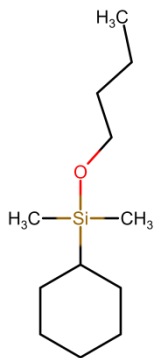

1-Cyclohexyldimethylsilyloxybutane

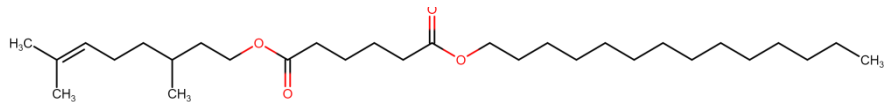

Adipic acid,  $\beta$ -citronellyl tetradecyl ester

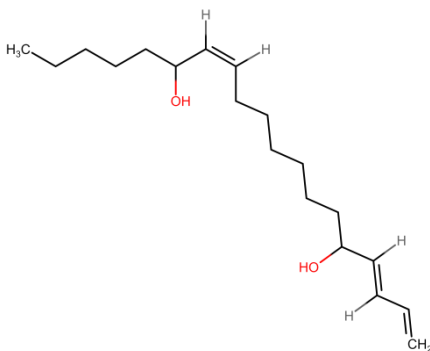

E,E,Z-1,3,12-Nonadecatriene-5,14-diol

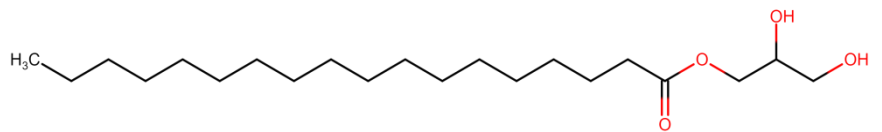

Octadecanoic acid, 2,3-dihydroxypropyl ester

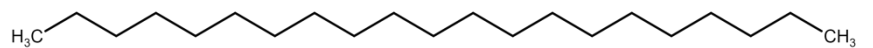

Heneicosane

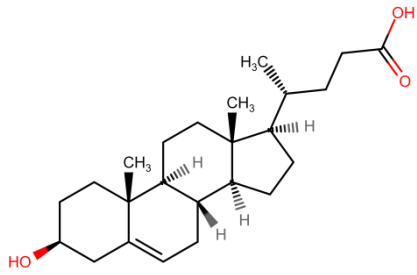

3.beta.-Hydroxy-5-cholen-24-oic acid

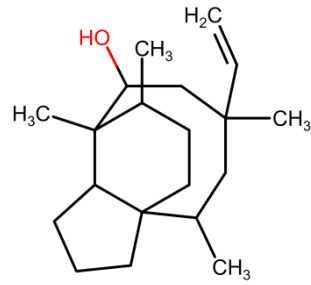

2,4,7,14-Tetramethyl-4-vinyl-tricyclo[5.4.3.0(1,8)]tetradecan-6-ol

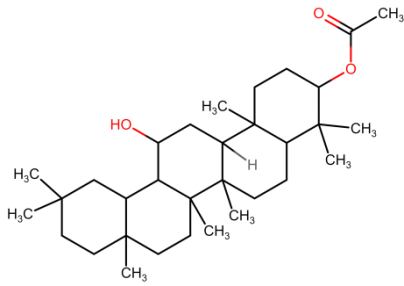

Acetic acid, 13-hydroxy-4,4,6a,6b,8a,11,14b-octamethyldocosahydropicen-3-yl

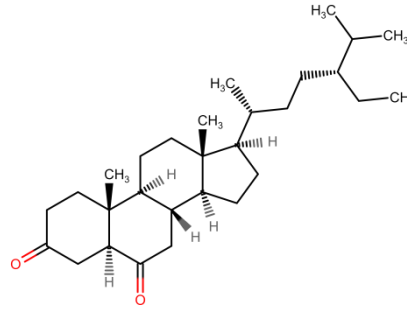

Stigmastane-3,6-dione, (5.alpha.)-

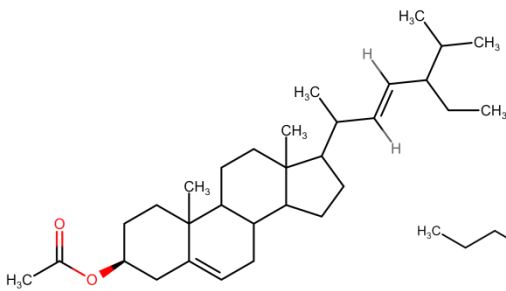

Stigmasta-5,22-dien-3-ol, acetate, (3.β)-

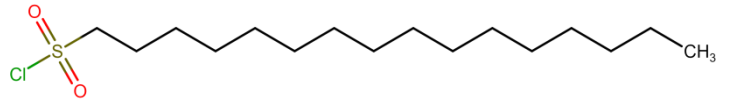

1-Hexadecanesulfonyl chloride

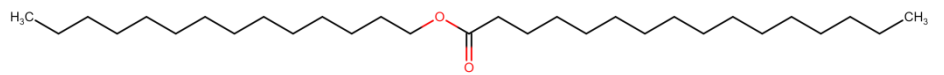

Hexadecanoic acid, tetradecyl ester

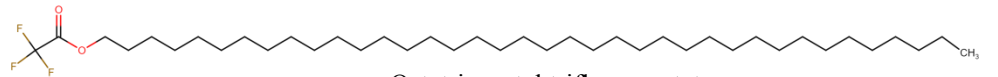

Octatriacontyl trifluoroacetate

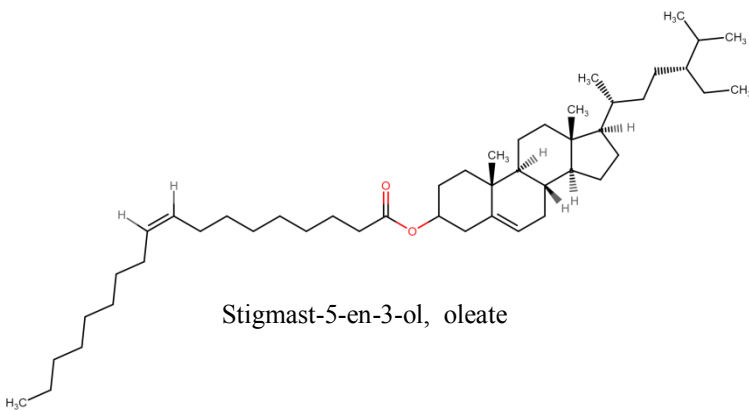

Stigmast-5-en-3-ol, oleate
